# Supplementary material for: Unique role of β-cyclodextrin in modifying aggregation of Triton X-114 in aqueous solutions
Source: Royal Society of Chemistry journal article supplement (doi:10.1039/c2sm07371d), 2012-01-01
Supplement: c2sm07371d.pdf [file c2sm07371d.pdf]

**Supporting Information for:**

Unique role of  $\beta$ -cyclodextrin in modifying aggregation of Triton X-114 in aqueous solutions

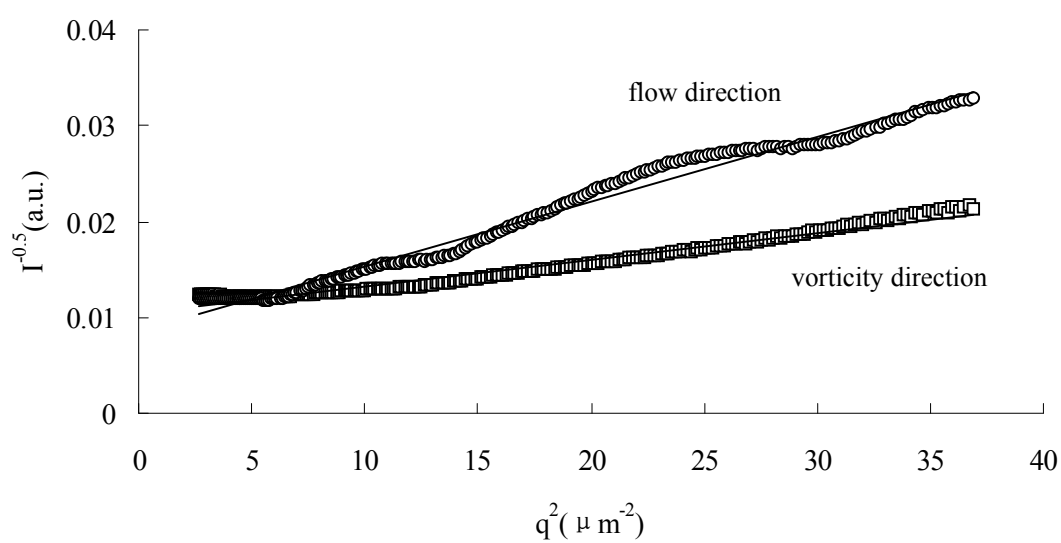

**Figure S1.** Debye-Bueche plots for the SALS patterns from the TX-114 solution with 5 mM  $\beta$ -CD concentration at 26°C. Symbols indicate the measured intensity while the lines are the linear fits to the data.
